# Supplementary material for: Syntaxin-17 delivers PINK1/parkin-dependent mitochondrial vesicles to the endolysosomal system
Source: PubMed Central journal article supplement — J Cell Biol. 2016 Aug 1;214(3):275–91. doi: 10.1083/jcb.201603105 (PMC4970327; doi:10.1083/jcb.201603105), 2016-08-01
Supplement: JCB_201603105_sm.pdf [file JCB_201603105_sm.pdf]

McLelland et al., <http://www.jcb.org/cgi/content/full/jcb.201603105/DC1>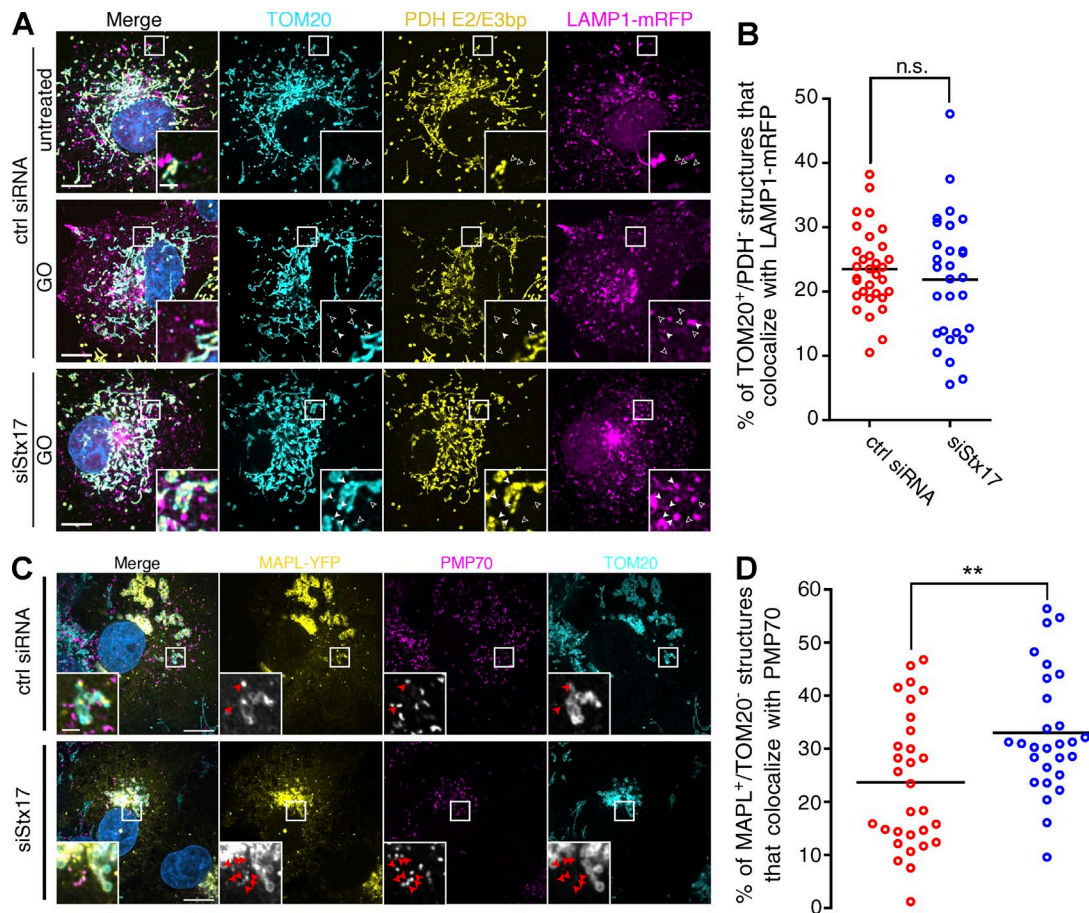

Figure S1. **Silencing of Stx17 does not perturb other MDV pathways.** (A) Representative confocal images of cells expressing LAMP1-mRFP (magenta) treated with glucose oxidase (GO), then fixed and immunostained for PDH E2/E3bp (yellow) and TOM20 [cyan; Hoescht, blue]. TOM20<sup>+</sup>/PDH E2/E3bp<sup>-</sup> structures that are positive (white arrowheads) or negative (empty arrowheads) for LAMP1 are indicated. Bars: (main) 10  $\mu$ m; (inset) 2  $\mu$ m. (B) Quantification of the percent of TOM20<sup>+</sup>/PDH E2/E3bp<sup>-</sup> structures that colocalize with LAMP1-mRFP in Stx17-silenced COS7 cells treated with 50 mU/ml glucose oxidase or left untreated. Bars represent mean;  $n = 32$ –39 cells per condition; n.s., not significant. (C) COS7 cells transfected with MAPL-YFP (yellow) and the indicated siRNA were fixed and immunostained for TOM20 (cyan) and PMP70 (magenta, a peroxisomal marker; Hoescht, blue). Red arrowheads indicate PMP70-labeled peroxisomes that also contain MAPL-YFP. Bars: (main) 10  $\mu$ m; (inset) 2  $\mu$ m. (D) Quantification of the percentage of PMP70-labeled peroxisomes that also contain MAPL-YFP per cell in control siRNA (red) and siStx17 (blue) cells from C. Bars represent the mean;  $n = 30$  and 28 cells for ctrl siRNA and siStx17, respectively; \*\*,  $P < 0.01$ .

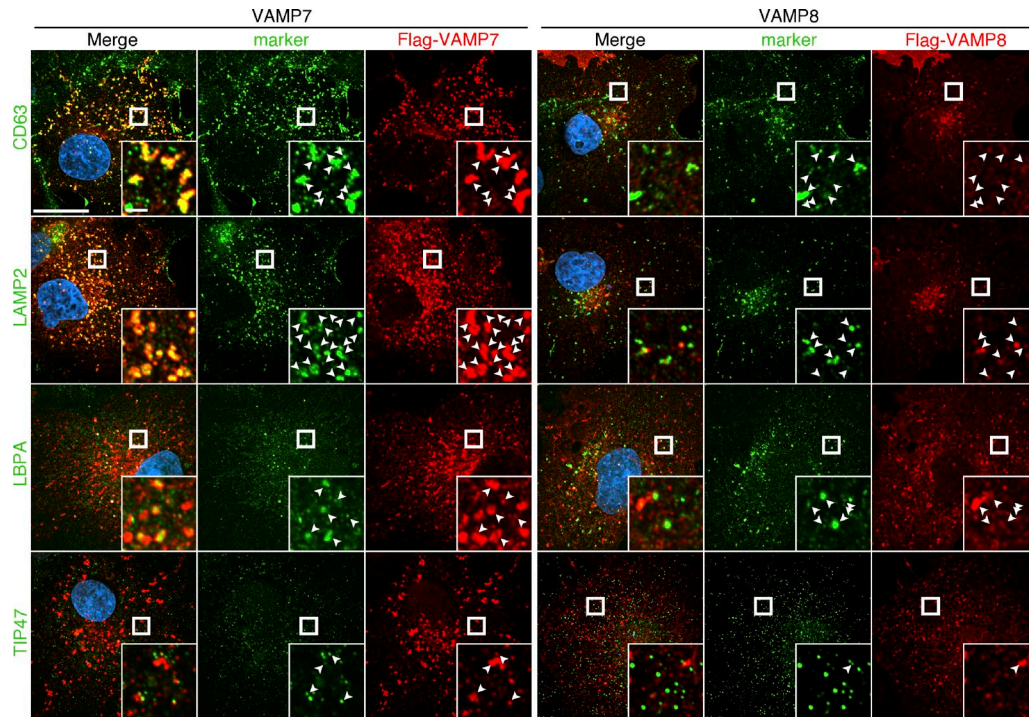

Figure S2. **VAMP7 and VAMP8 localize to late endosomes and lysosomes.** COS7 cells expressing Flag-VAMP7 (left) or Flag-VAMP8 (right) were fixed and immunostained for the Flag tag (red) and the indicated late endosomal/lysosomal (CD63, LAMP2) or strictly late endosomal (TIP47, LBPA) marker (green; Hoescht, blue). Arrowheads indicate structures that are positive for both the Flag-VAMP and the corresponding marker. Bars: (main) 20  $\mu$ m; (inset) 2  $\mu$ m.

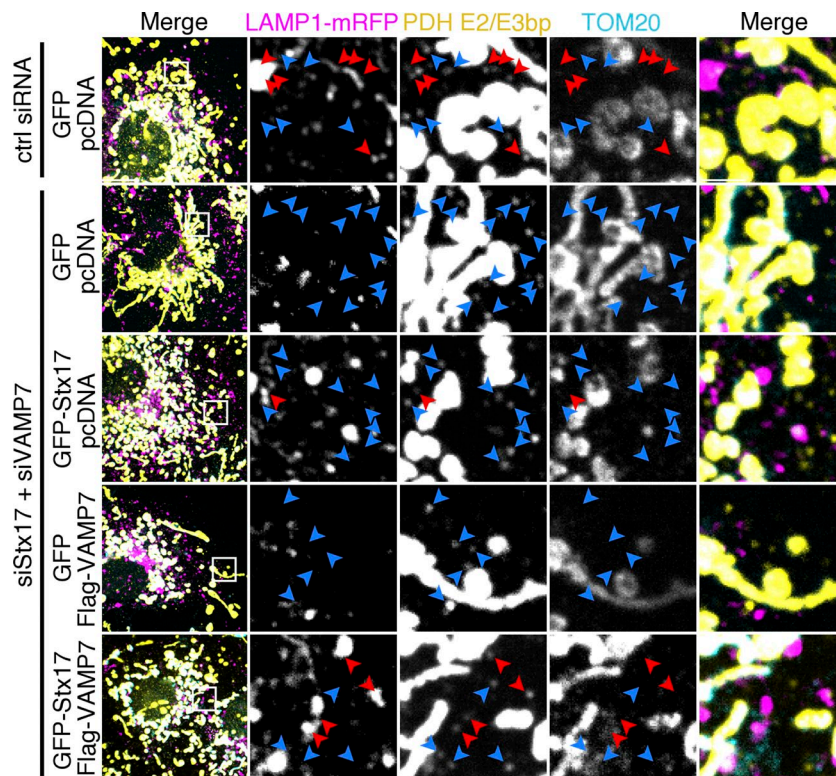

Figure S3. **MDV targeting in cells lacking Stx17-associated SNAREs.** Representative confocal images of COS7 cells from Fig. 5 (I and J) treated with 25  $\mu$ M antimycin A for 45 min, then fixed and immunostained against PDH E2/E3bp (yellow) and TOM20 (cyan; LAMP1-mRFP, magenta). PDH E2/E3bp<sup>+</sup>/TOM20<sup>-</sup> structures that are positive (red arrowheads) or negative (blue arrowheads) for LAMP1 are indicated. Bars: (main) 10  $\mu$ m; (zoom) 2  $\mu$ m.

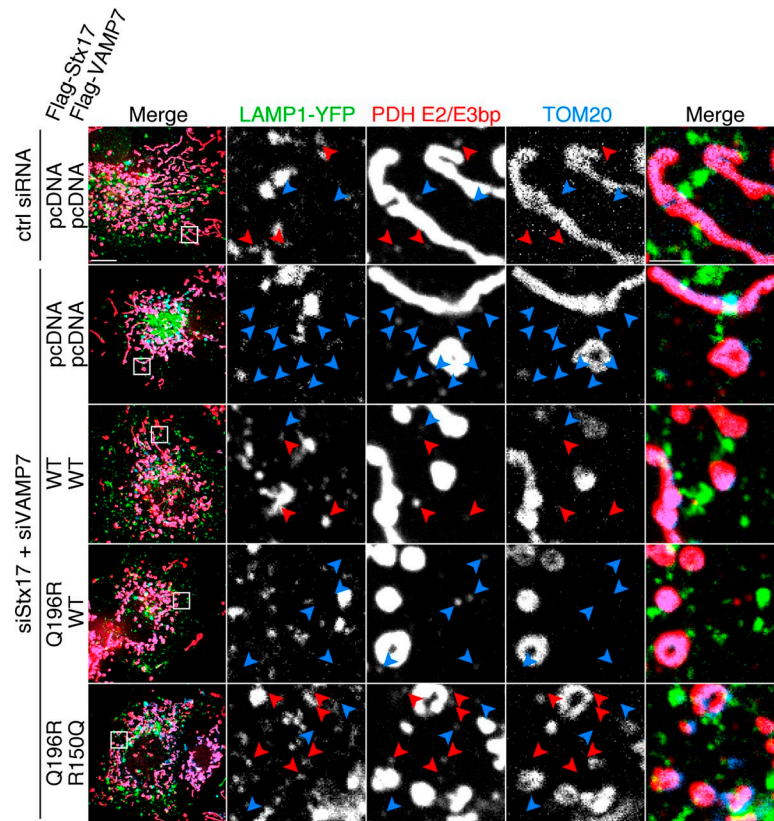

Figure S4. **MDV targeting in cells reconstituted with zero-layer mutants.** Representative confocal images of COS7 cells from Fig. 7 (G and H) treated with 25  $\mu$ M antimycin A for 45 min, then fixed and immunostained against PDH E2/E3bp (red) and TOM20 (blue; LAMP1-YFP, green). PDH E2/E3bp<sup>+</sup>/TOM20<sup>-</sup> structures that are positive (red arrowheads) or negative (blue arrowheads) for LAMP1 are indicated. Bars: (main) 10  $\mu$ m; (zoom) 2  $\mu$ m.

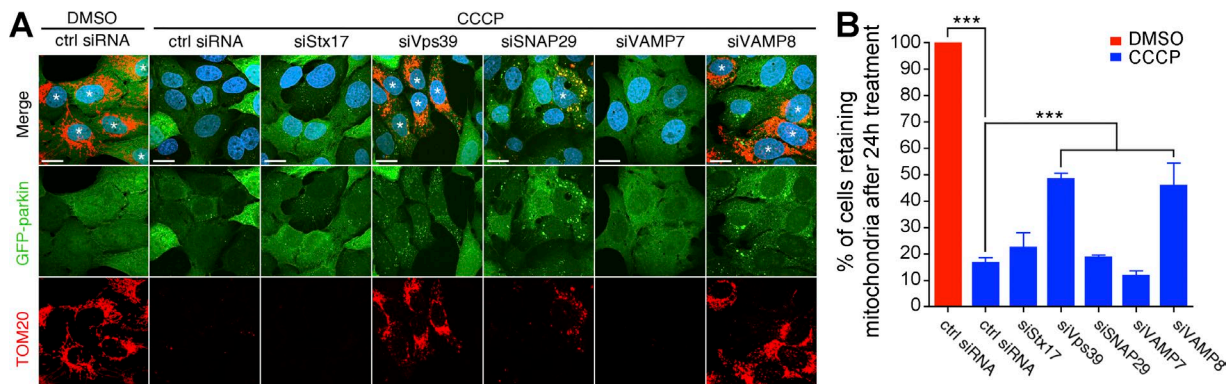

Figure S5. **Stx17 is dispensable for depolarization-induced mitophagy.** (A) Representative confocal images of U2OS:GFP-parkin (green) cells (grown on glucose) treated with 20  $\mu$ M CCCP or DMSO for 24 h. Mitophagy was monitored by then fixing and immunostaining for TOM20 (red; Hoescht 33342, blue). Cells that have retained their mitochondria are marked by asterisks. Bars, 20  $\mu$ m. (B) Quantification of the percent of cells retaining mitochondria from cells in A. Bars represent mean  $\pm$  SEM;  $n = 3$  replicate cells per condition, with >100 cells counted per condition for each replicate; \*\*\*,  $P < 0.001$ .
